# Supplementary material
Source: PubMed Central journal article supplement (PMC240716)

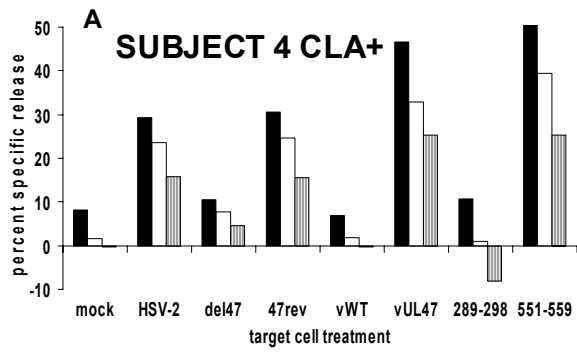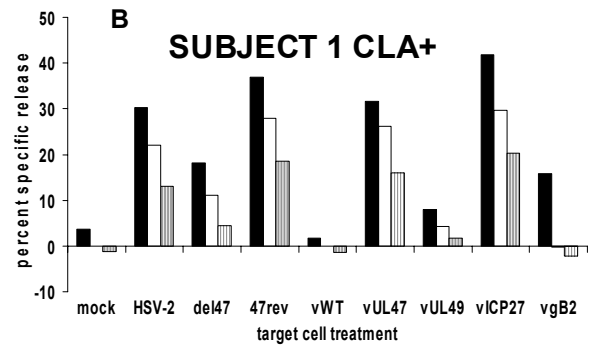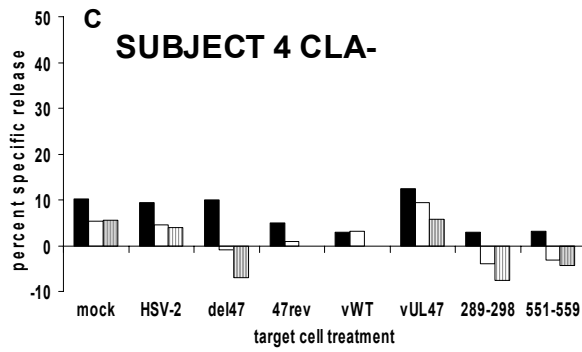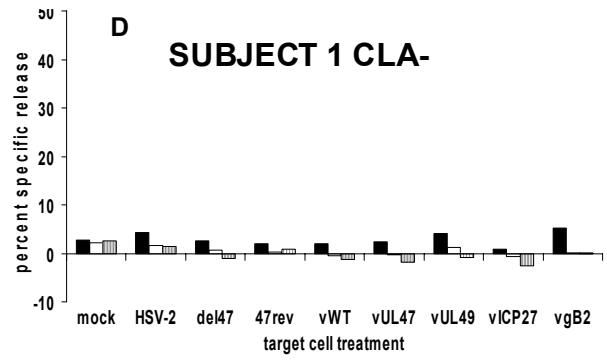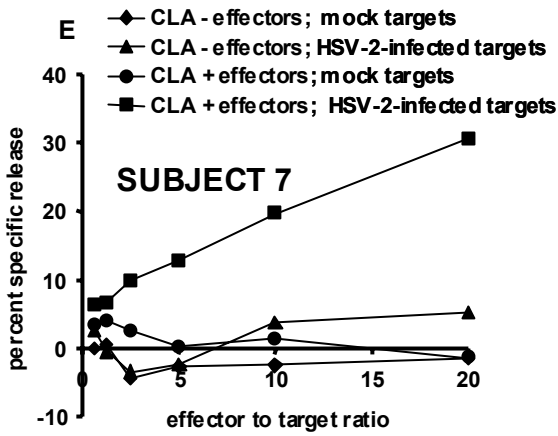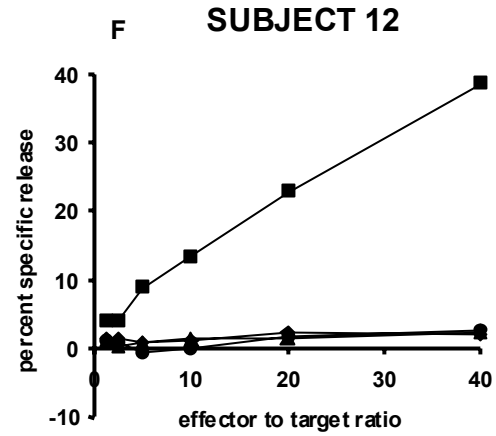

Supplement: pnas_100_22_12899__3.pdf [file pnas_100_22_12899__3.pdf]
